# Supplementary material for: Simultaneous Improvement of Dissolution Behavior and Oral Bioavailability of Antifungal Miconazole via Cocrystal and Salt Formation
Source: MDPI journal article supplement (doi:10.3390/pharmaceutics14051107), 2022-05-22
Supplement: s1 [file s1]

Supporting Information  
for

# **Simultaneous Improvement of Dissolution Behavior and Oral Bioavailability of Antifungal Miconazole via Cocrystal and Salt Formation**

**Ksenia V. Drozd, Alex N. Manin, Denis E. Boycov and German L. Perlovich \***

G.A. Krestov Institute of Solution Chemistry of the Russian Academy of Sciences,  
1 Akademicheskaya St., 153045 Ivanovo, Russia

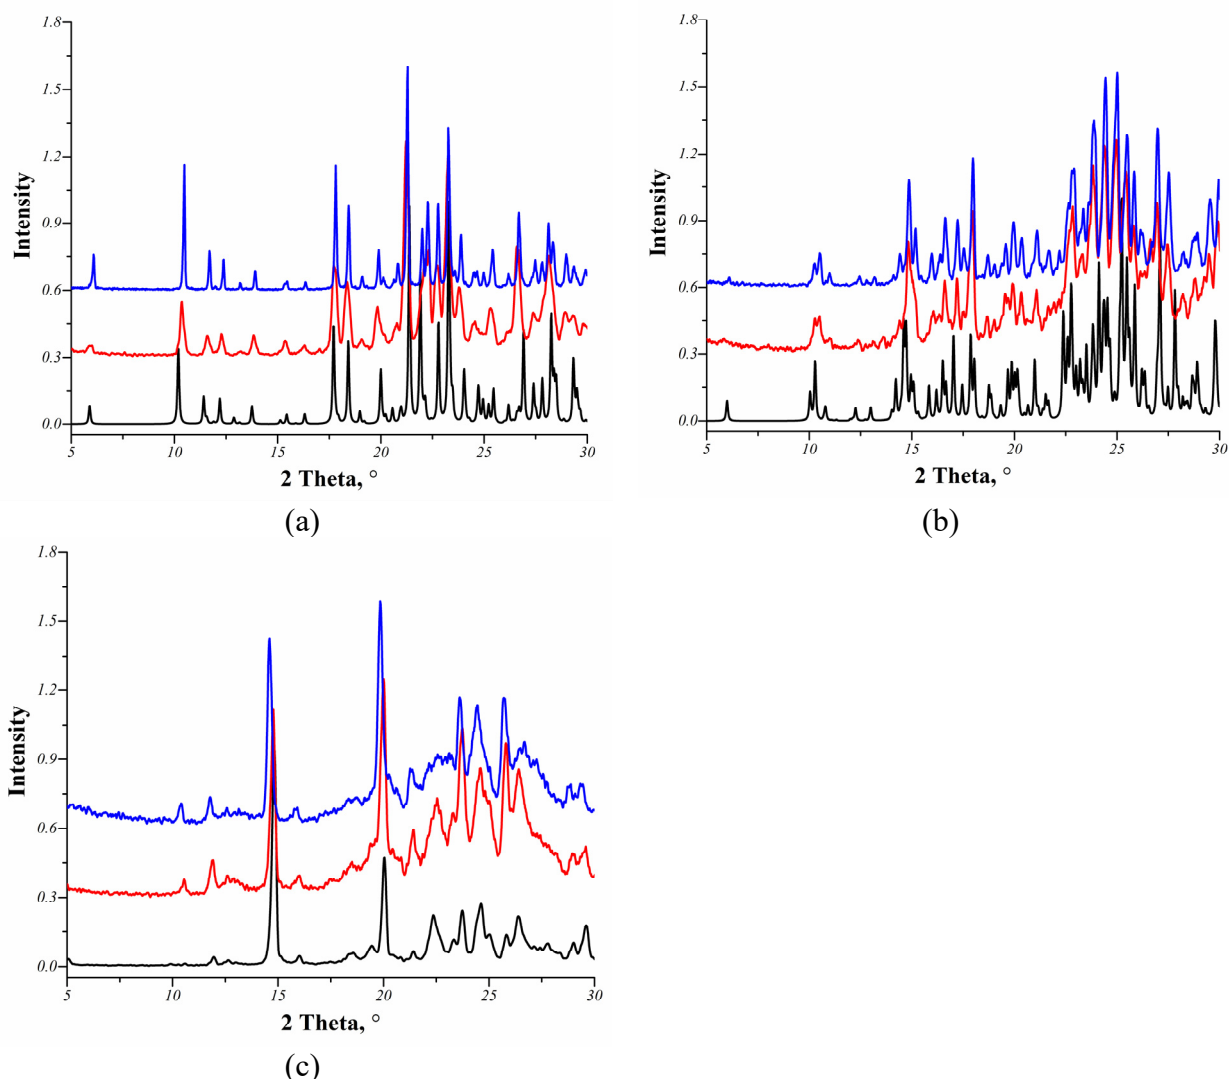

Figure S1. Overlay of the experimental PXRD patterns of the MCL multicomponent crystals prepared by LAG (red line) and slurry (blue line) and calculated PXRD (black line) from the X-ray crystal structure for: (a) [MCL+SucAc] (2:1), (b) [MCL+MlcAc] (1:1) and (c) [MCL+TartAc] (1:1).

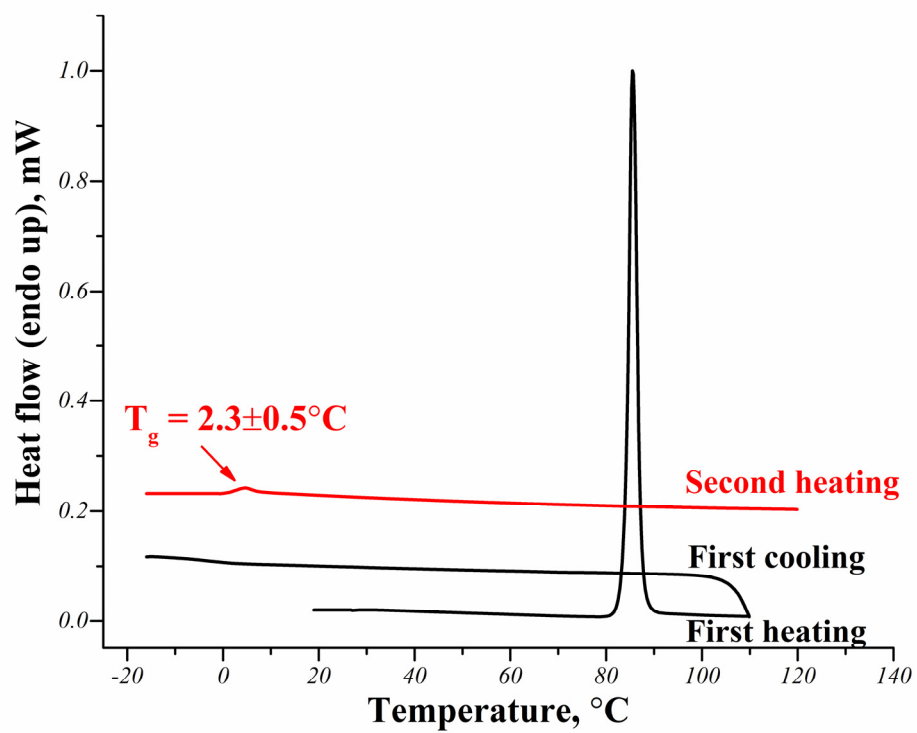

Figure S2. DSC profiles of MCL indicating its transformation from crystalline to the glassy state by cooling sample from the melt.

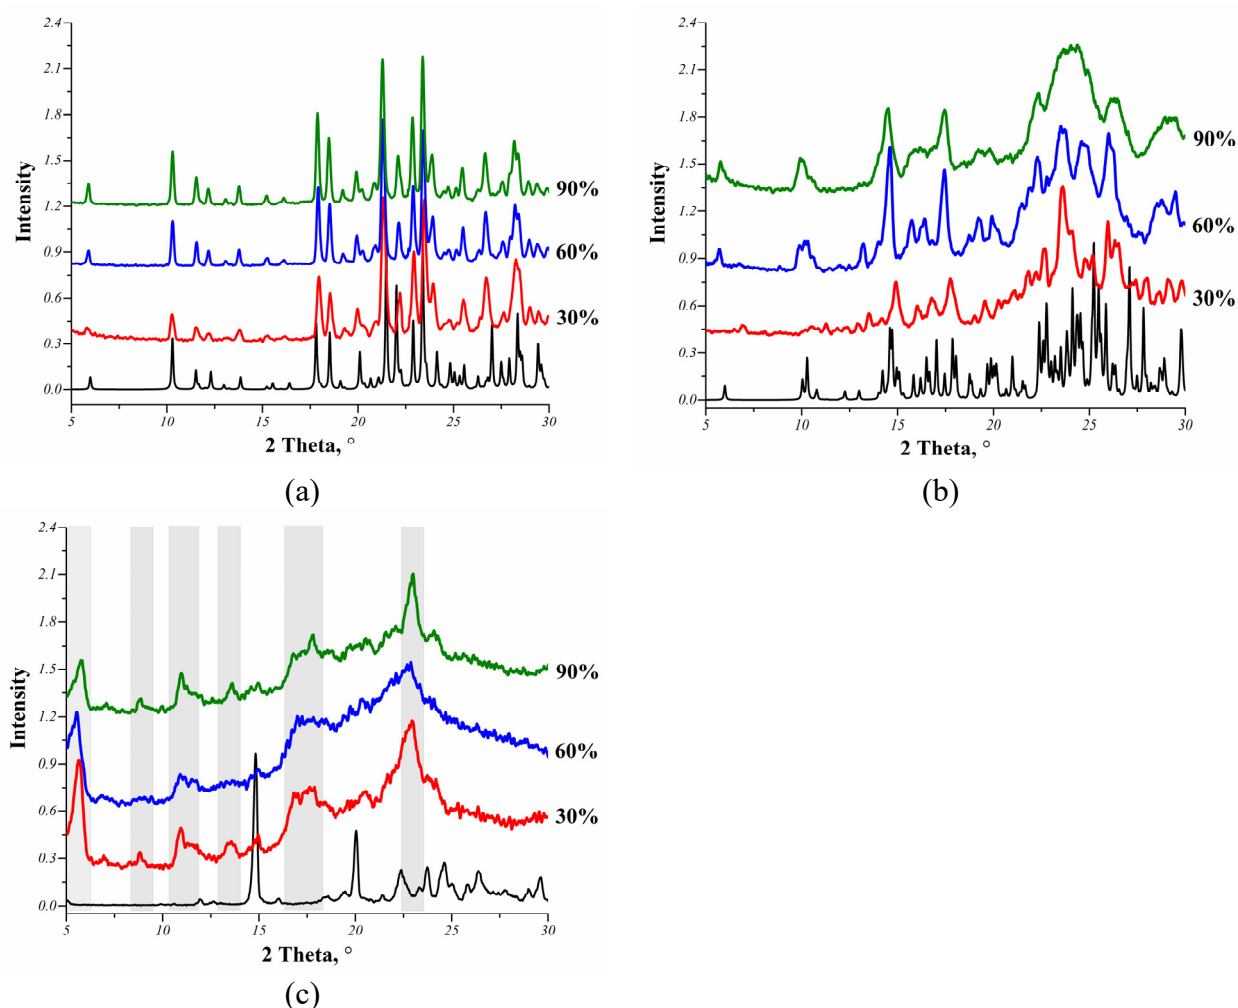

Figure S3. Overlay of the experimental PXRD patterns of the freeze-dried powders of (a) [MCL+SucAc] cocrystal (2:1), (b) [MCL+MlcAc] salt (1:1) and (c) [MCL+TartAc] salt (1:1) obtained from TBA/H<sub>2</sub>O mixtures with different TBA content. The numbers show the percentage of TBA in the TBA/H<sub>2</sub>O mixture. The black patterns correspond to the calculated PXRD of the MCL multicomponent crystals. Grey stripes highlight some unique peaks different from the peaks of the crystalline [MCL+TartAc] salt.

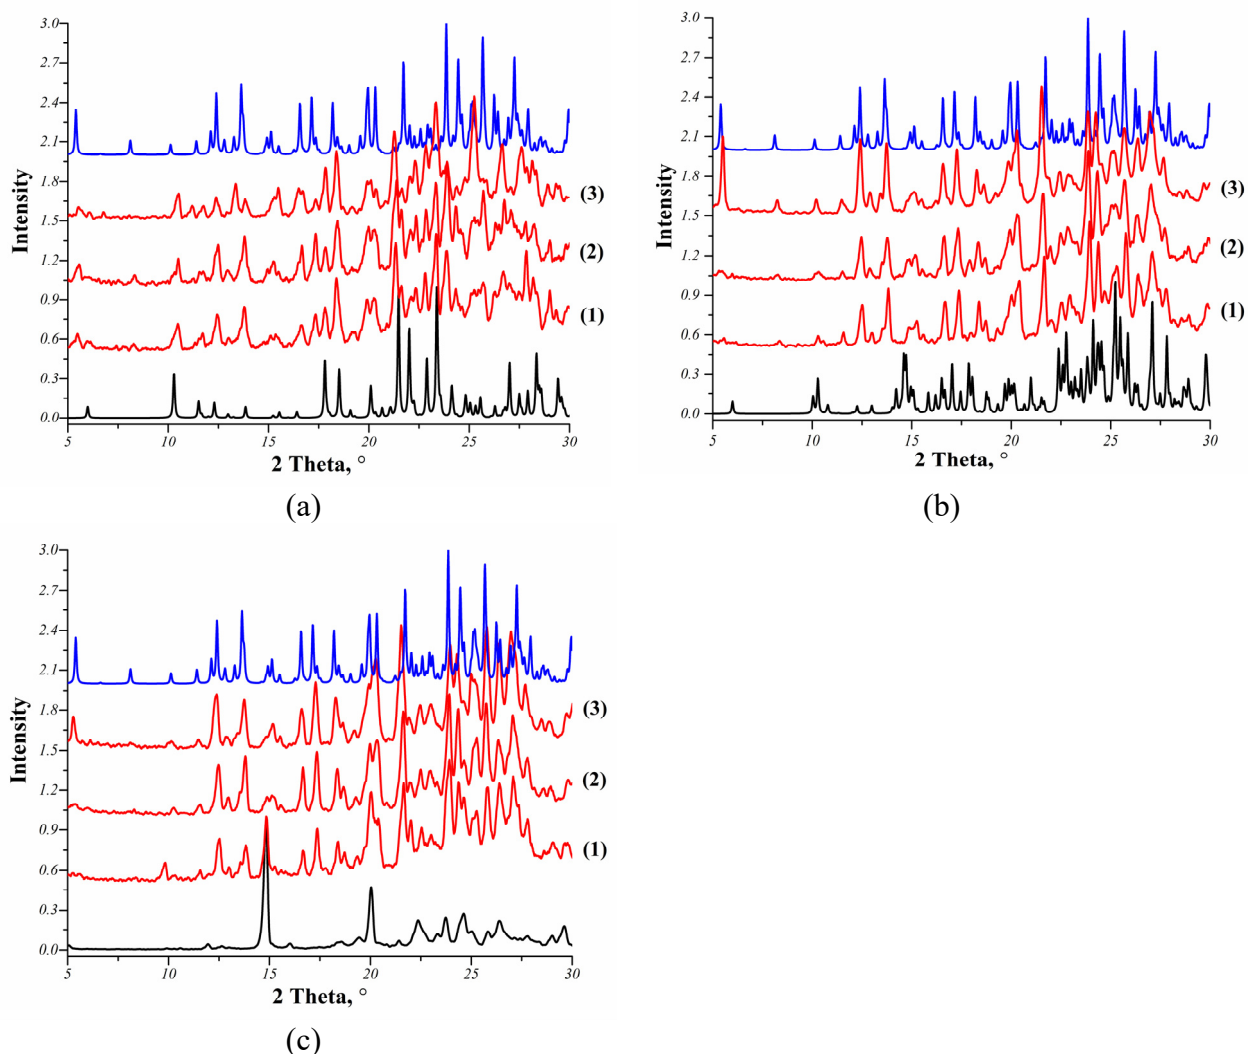

Figure S4. Results of PXR D analysis of the residual materials collected at the end of the dissolution experiments: (a) [MCL+SucAc] cocystal (2:1), (b) [MCL+MlcAc] salt (1:1) and (c) [MCL+TartAc] salt (1:1). Key: black line – calculated PXR D of the MCL cocystal/salt, blue line - calculated PXR D of the MCL hemihydrate. Red lines correspond to solid phases of the MCL multicomponent crystals prepared by LAG (1), slurring (2) or freeze-drying (3) after dissolution experiments.

Table S1. Crystallinity percentage of the freeze-dried powders of the MCL multicomponent crystals calculated on basis of PXRD analysis

|                    | Crystallinity percentage of the freeze-dried powders, % <sup>a</sup> |                            |                            |
|--------------------|----------------------------------------------------------------------|----------------------------|----------------------------|
|                    | TBA/H <sub>2</sub> O 30:70                                           | TBA/H <sub>2</sub> O 60:40 | TBA/H <sub>2</sub> O 90:10 |
| [MCL+SucAc] (2:1)  | 89.9                                                                 | 89.7                       | 89.1                       |
| [MCL+MlcAc] (1:1)  | 84.3                                                                 | 82.0                       | 79.4                       |
| [MCL+TartAc] (1:1) | 60.6                                                                 | 46.0                       | 50.1                       |

<sup>a</sup> The crystallinity was calculated from the ratio of the area of all crystalline peaks to the total area

Table S2. Thermophysical data of the MCL multicomponent crystals prepared by the multiple methods

| MCL<br>multicomponent<br>crystal | Preparation<br>method | $T_{fus}^{onset}$ , °C |           | $\Delta H_{fus}^T$ , J·g <sup>-1</sup> |           |
|----------------------------------|-----------------------|------------------------|-----------|----------------------------------------|-----------|
|                                  |                       | literature*            | this work | literature*                            | this work |
| [MCL+SucAc]<br>(2:1)             | LAG                   | 119.7±0.2              | 117.6±0.2 | 82.2±0.5                               | 77.4±0.5  |
|                                  | slurry                |                        | 119.5±0.2 |                                        | 82.5±0.5  |
|                                  | freeze-drying         |                        | 117.7±0.2 |                                        | 85.6±0.5  |
| [MCL+MlcAc]<br>(1:1)             | LAG                   | 140.3±0.2              | 135.9±0.2 | -                                      | -         |
|                                  | slurry                |                        | 140.5±0.2 |                                        | -         |
|                                  | freeze-drying         |                        | 136.8±0.2 |                                        | -         |
| [MCL+TartAc]<br>(1:1)            | LAG                   | 171.4±0.2              | 170.6±0.2 | 164.4±0.5                              | 163.6±0.5 |
|                                  | slurry                |                        | 171.5±0.2 |                                        | 164.5±0.5 |
|                                  | freeze-drying         |                        | 155.8±0.2 |                                        | 86.0±0.5  |

\* Drozd, K. V; Manin, A.N.; Voronin, A.P.; Boycov, D.E.; Churakov, A. V; Perlovich, G.L. A combined experimental and theoretical study of miconazole salts and cocrystals: crystal structures, DFT computations, formation thermodynamics and solubility improvement. Phys. Chem. Chem. Phys. 2021, 23, 12456–12470
